# Supplementary material for: One ancestor for two codes viewed from the perspective of two complementary modes of tRNA aminoacylation
Source: Springer Nature journal article supplement (doi:10.1186/1745-6150-4-4), 2009-01-01
Supplement: Additional file 5 [file 1745-6150-4-4-s5.doc]

Major units:

Anticodon triplets (5’-GCC-3’ and complementary 5’-GGC-3’)

Ending tetramers (5’-NCCA-3’and complementary 5’-UGGИ-3’)

**3’-ACCNCGGИGGU-5’**

Ancestral complementary palindromes

**5’-UGGИGCCNCCA-3’**

**3’-ACCNCGGИGGU…**

proto-acceptor

**||||||||**

Duplications

by self-priming and self-templating

**5’-*И*GCCNCCA…**

**3’-ACCNCGGИGGU…ACCNC**

proto-anticodon

**:||||||| || C**

**5’-*И*GCCNCCA…UGGИG**

**5’-uggиgccncca…ugg**

**3’-ACCNCGGИGGU…ACC…………NCCGИ…GGUACCNC**

**:||||||| ||| ||||| ||||| C**

**5’-*И*GCCNCCA…UGG…………ИGGCN…CCAUGGИG**

**3’-*n*cggиggu…acc**

**3’–ACCNCGGИGGU…ACC…gguaccnccgиgguNCCGИ-GGUACCNC**

**:||||||| ||| ||||||||||| ||||| ||||| C**

**5’-*И*GCCNCCA…UGG…ccauggиggcn ИGGCN-CCAUGGИG**

**C C N**

**A C**

**TC**

**U C**

**G ? G**

**G - И**

**V**

**C - G**

**Acceptor**

**stem**

**C – G C C G**

**A – U N И C N**

**3’–A C C N C G G И G G U G G U A C C**

**Anticodon**

**arm**

**: | | | | | | | | | | | C**

***И* G C C N C C A U G N C C A U G G**

**G – C G И**

**C – G**

**C – G**

**A - И**

**U N**

**D**

**G C**

**G G**

**И G**
