# Supplementary figures and images for: One ancestor for two codes viewed from the perspective of two complementary modes of tRNA aminoacylation
Source: Springer Nature journal article supplement (doi:10.1186/1745-6150-4-4), 2009-01-01

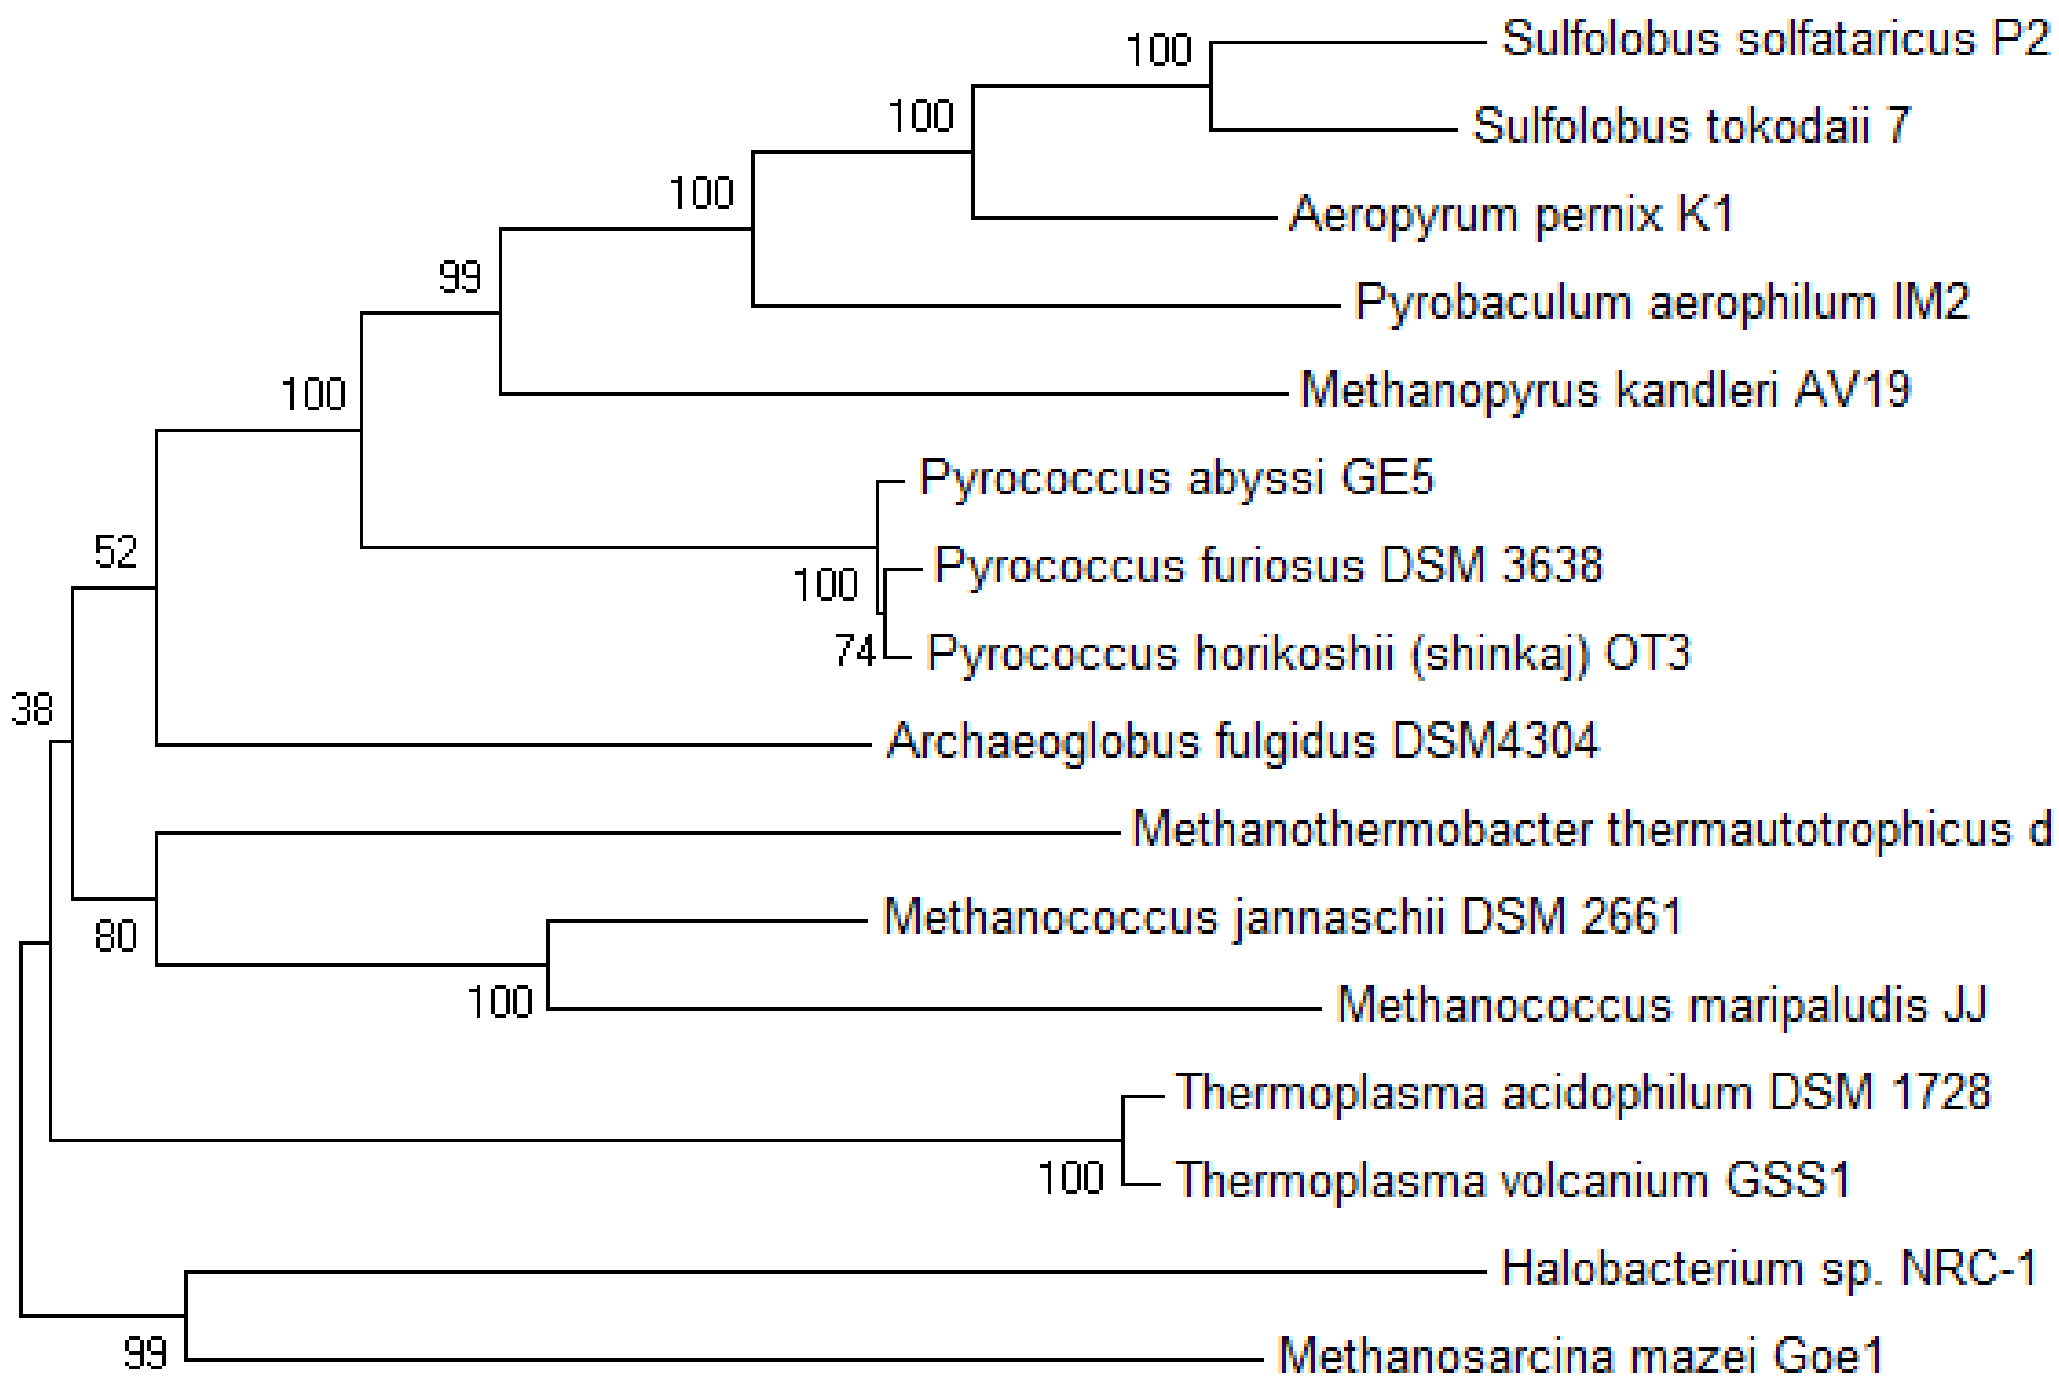

0.05

Supplement: Additional file 1 [file 1745-6150-4-4-s1.pdf]

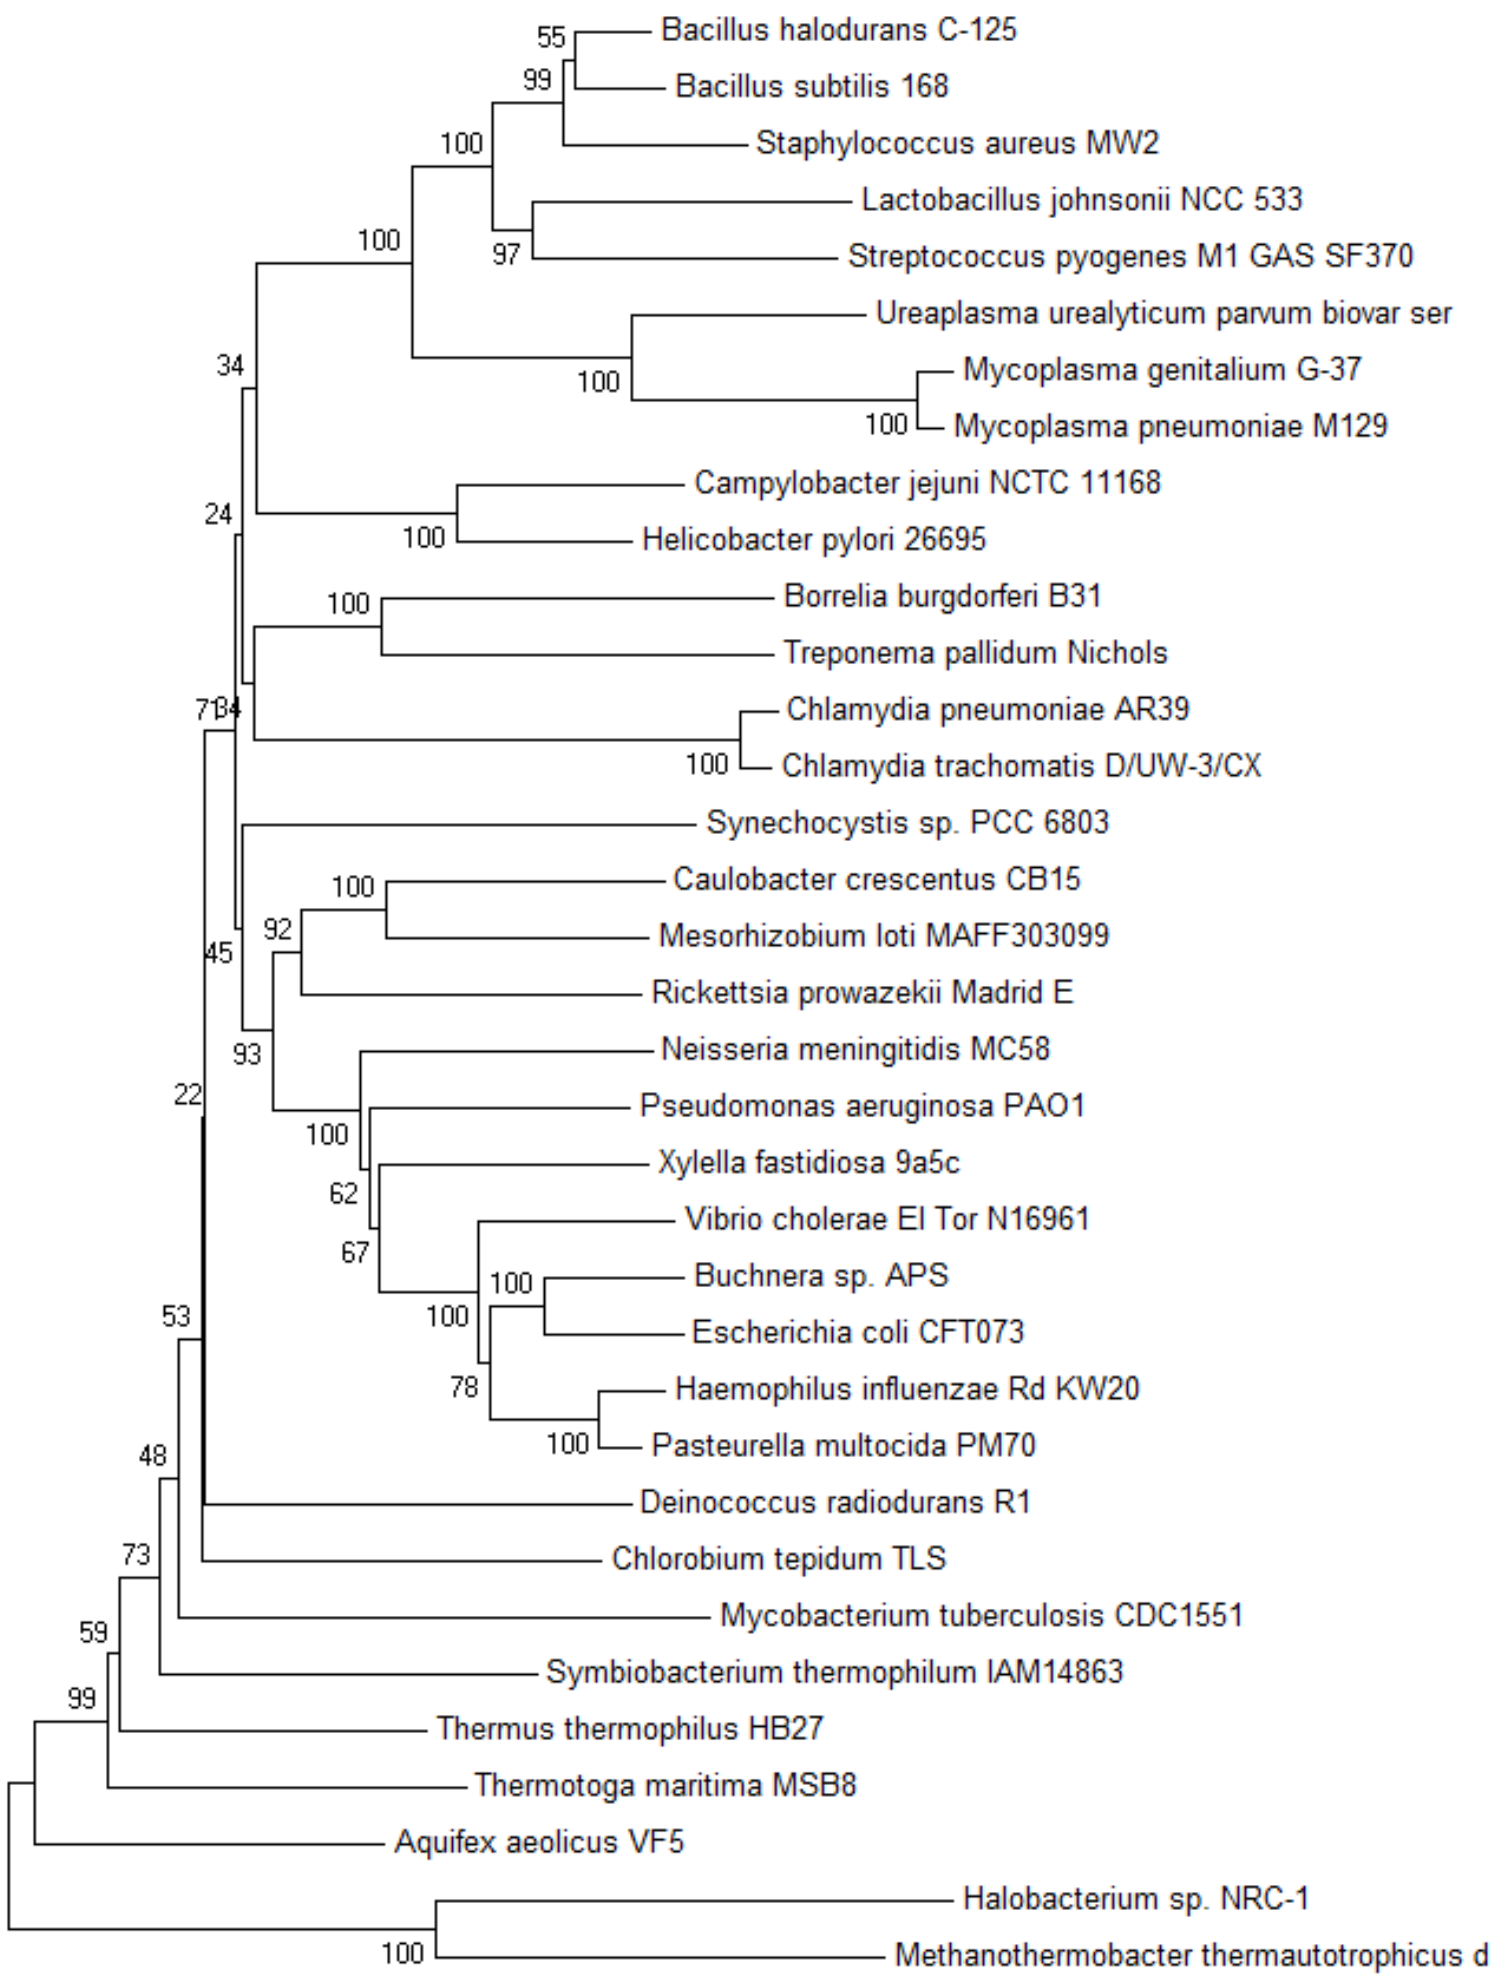

0.05

Supplement: Additional file 2 [file 1745-6150-4-4-s2.pdf]

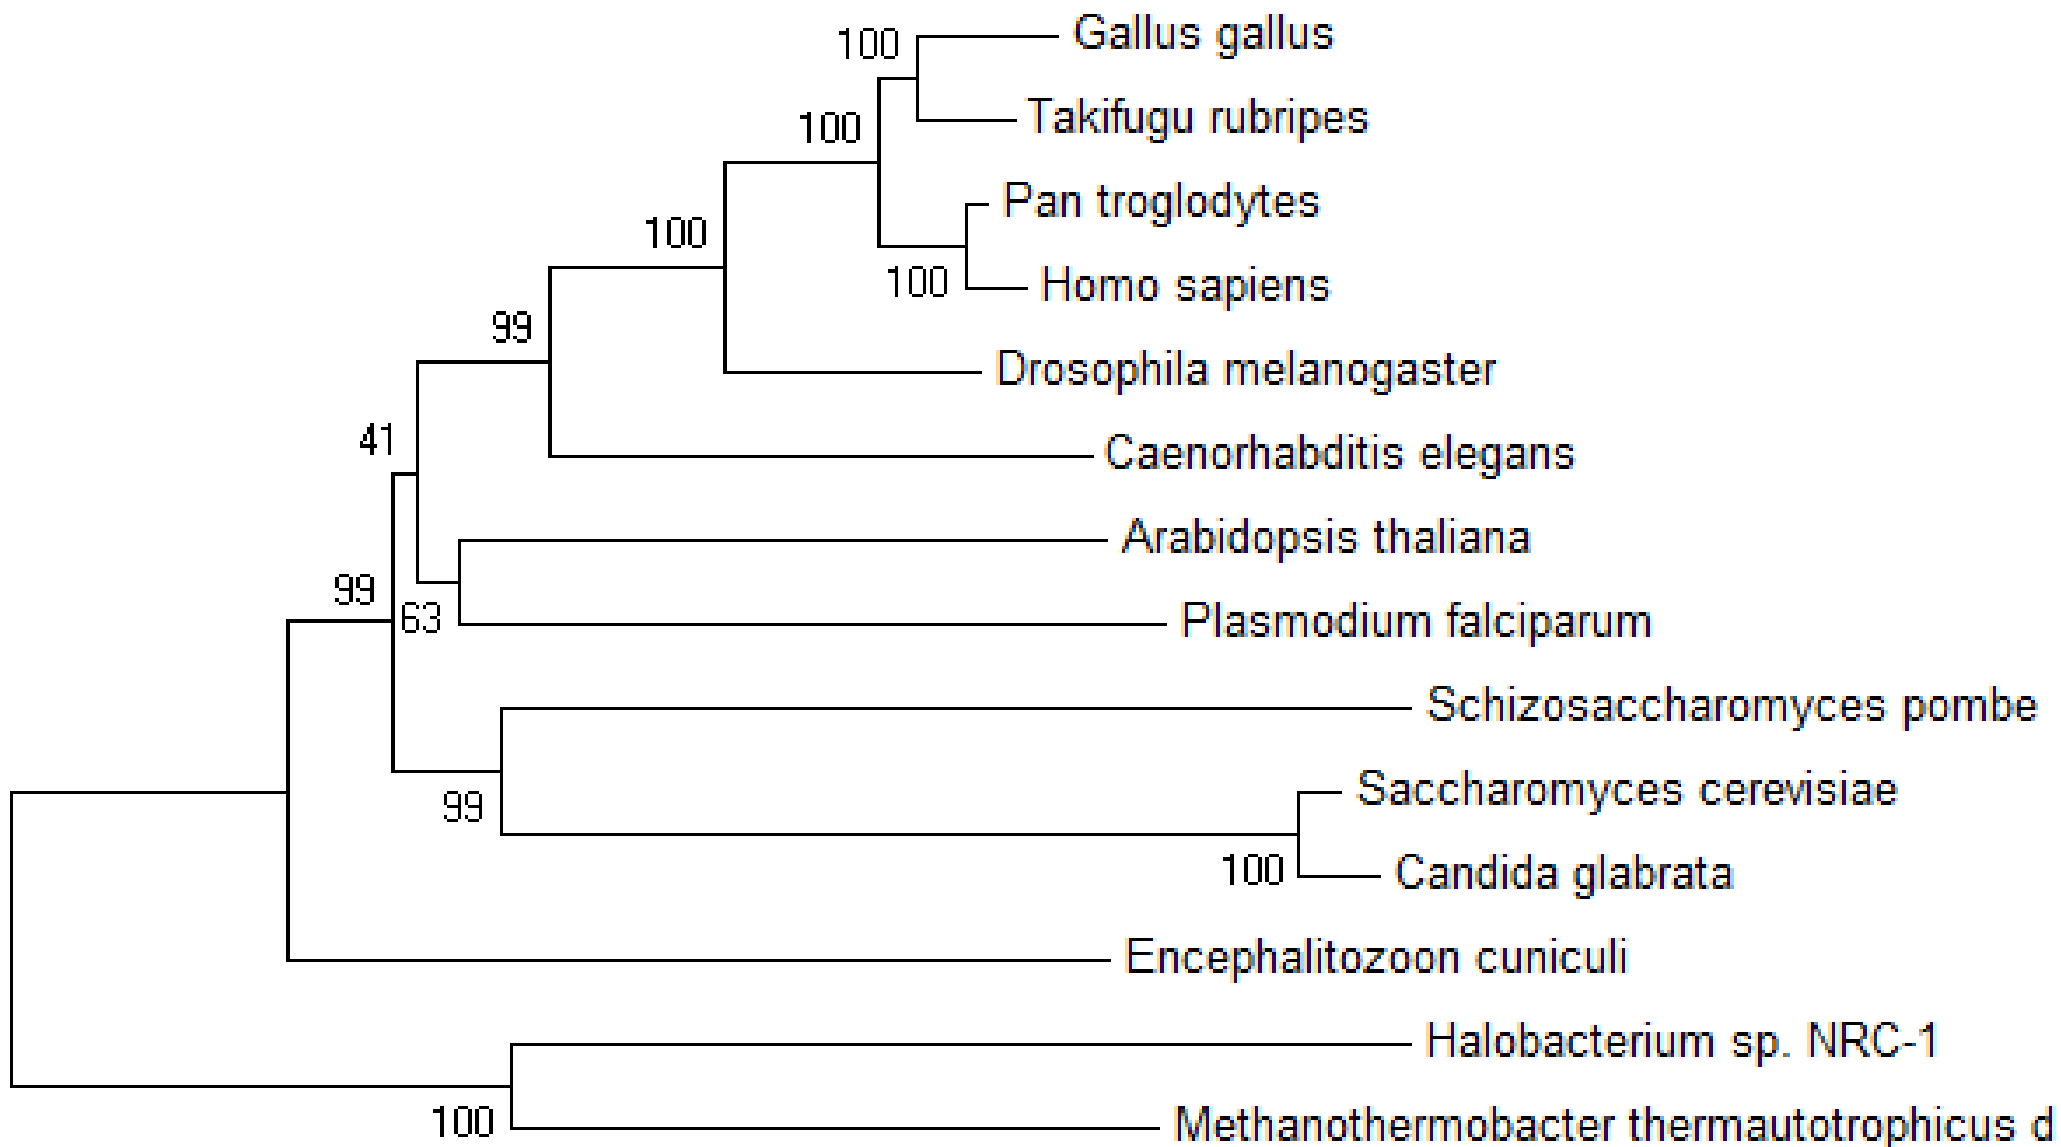

0.05

Supplement: Additional file 4 [file 1745-6150-4-4-s4.pdf]
